# Supplementary material for: Three critical hydrogen bonds determine the catalytic activity of the Diels–Alderase ribozyme
Source: PubMed Central journal article supplement — Nucleic Acids Res. 2011 Oct 5;40(3):1318–30. doi: 10.1093/nar/gkr812 (PMC3273808; doi:10.1093/nar/gkr812), 2011-10-05
Supplement: supp_gkr812_nar-01667-r-2011-File010.pdf [file supp_gkr812_nar-01667-r-2011-File010.pdf]

**Supplementary Material**

**Three critical hydrogen bonds determine the catalytic activity of the Diels-Alderase ribozyme**

**Stefanie Kraut, Dirk Bebenroth, Alexander Nierth, Andrei Yu. Kobitski, G. Ulrich Nienhaus and Andres Jäschke**

Supplementary Figures S1 – S8

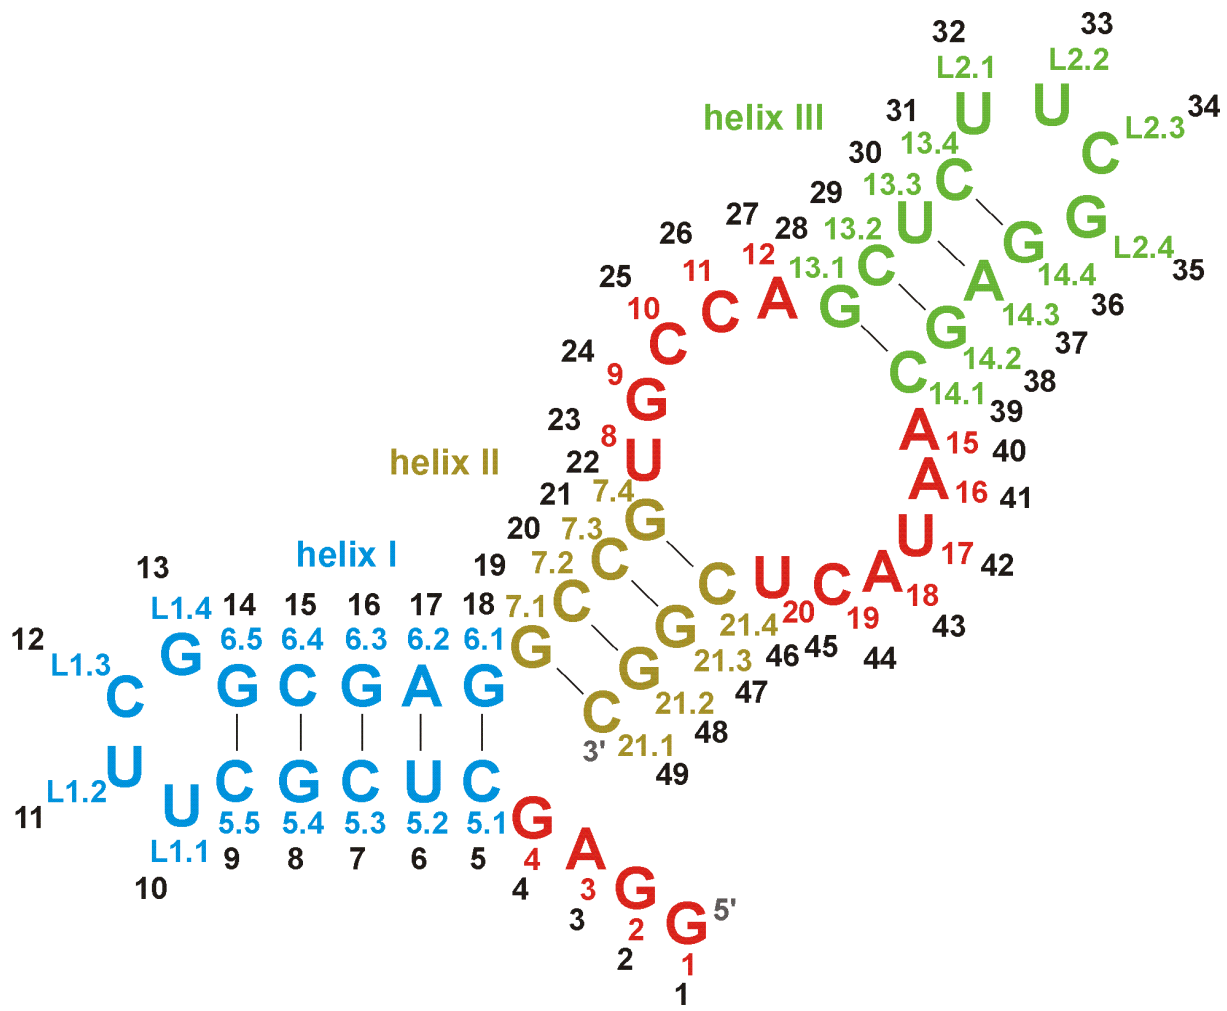

**Figure S1.** Diels-Alderase ribozyme translation map between the different numbering schemes in use. The colored scheme represents the original numbering (5) used in this manuscript, while Ref. (11) introduced a consecutive numbering scheme shown here in black.

1. Statistic incorporation of phosphorothioates  
 5'-terminal incorporation of initiator S ~~~~~GMP  
 N = parental nucleotide or δ = modified analog

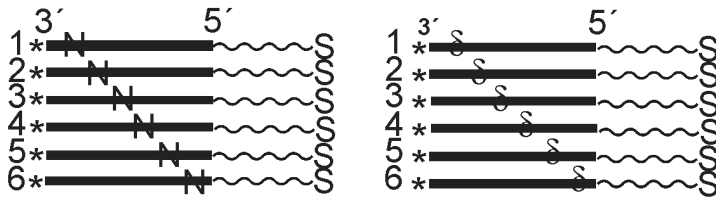

2. Reaction with biotin maleimide  
 Isolation of reacted (P) and unreacted (S) fractions

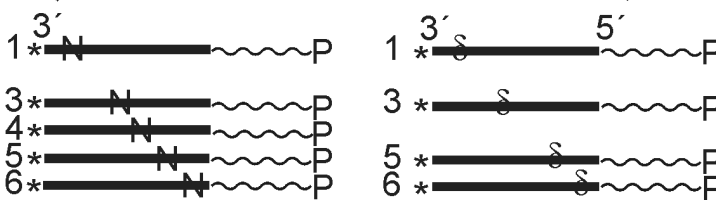

3. Iodine cleavage of the phosphorothioates

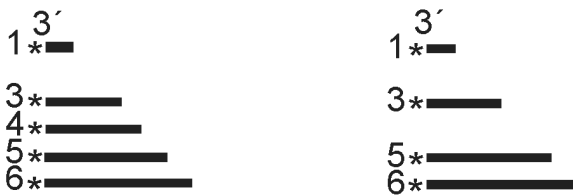

4. Electrophoresis and autoradiography

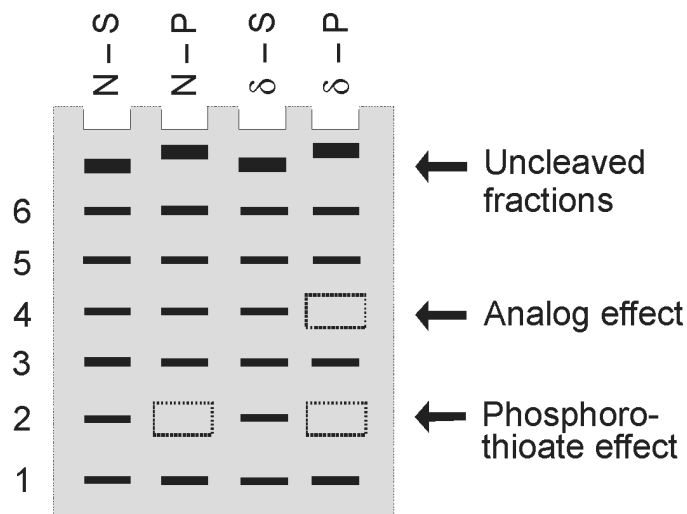

Figure S2. Schematic representation of the NAIM experiments for Diels-Alderase ribozymes.

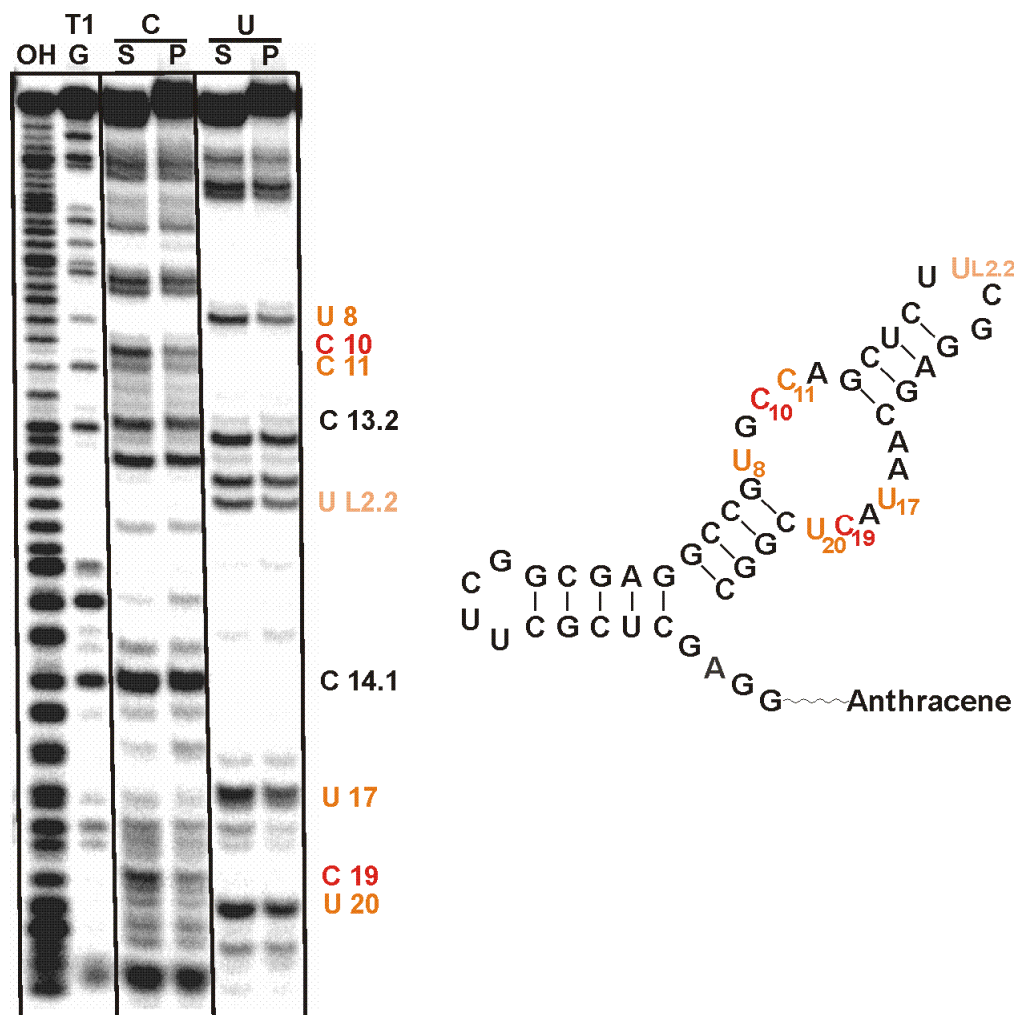

**Figure S3.** Phosphorothioate interference of Diels-Alderase ribozymes. Left: PAGE gel of the analysis of the parental pyrimidine nucleoside phosphorothioates. Lanes: OH – limited alkaline hydrolysis ladder, T1/G: RNase T1 cleavage ladder for sequence assignment, S – substrate (unreacted) fraction and P – product (reacted) fraction from reaction with biotin maleimide. Right: Summary of the effects. Red – activity 40-45% of wild-type activity, orange – 45-55%, light orange – ~75%, black – full activity.

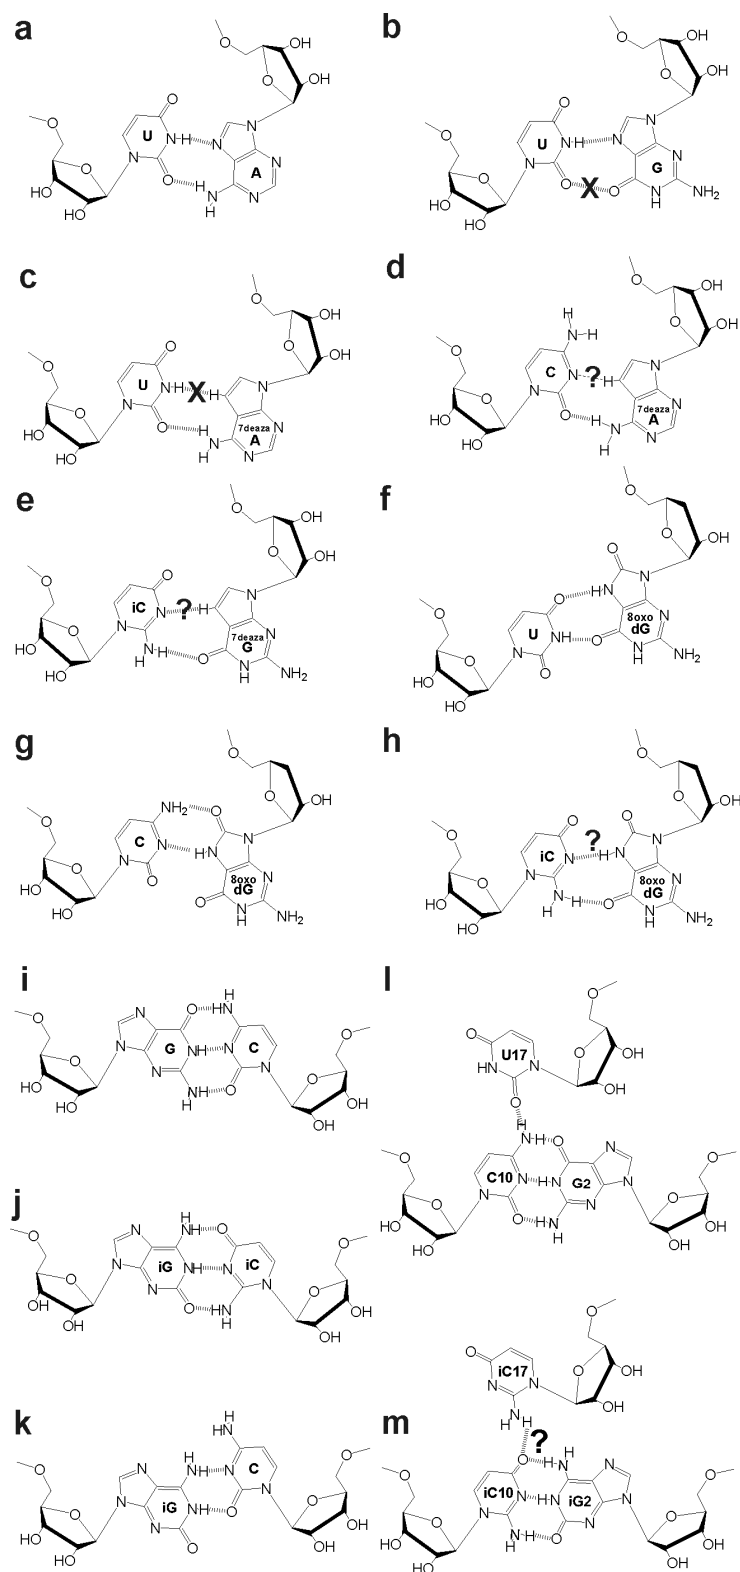

**Figure S4.** Different base pairing and triple interactions. a-h: combinations designed to support the U8-A18 reverse Hoogsteen base pair. i-k: G-C, isoG-isoC, and isoG-C base pairs. l-m: G2-C10-U17 base triple and the putative isosteric isoG2-isoC10-isoC17 mutant.

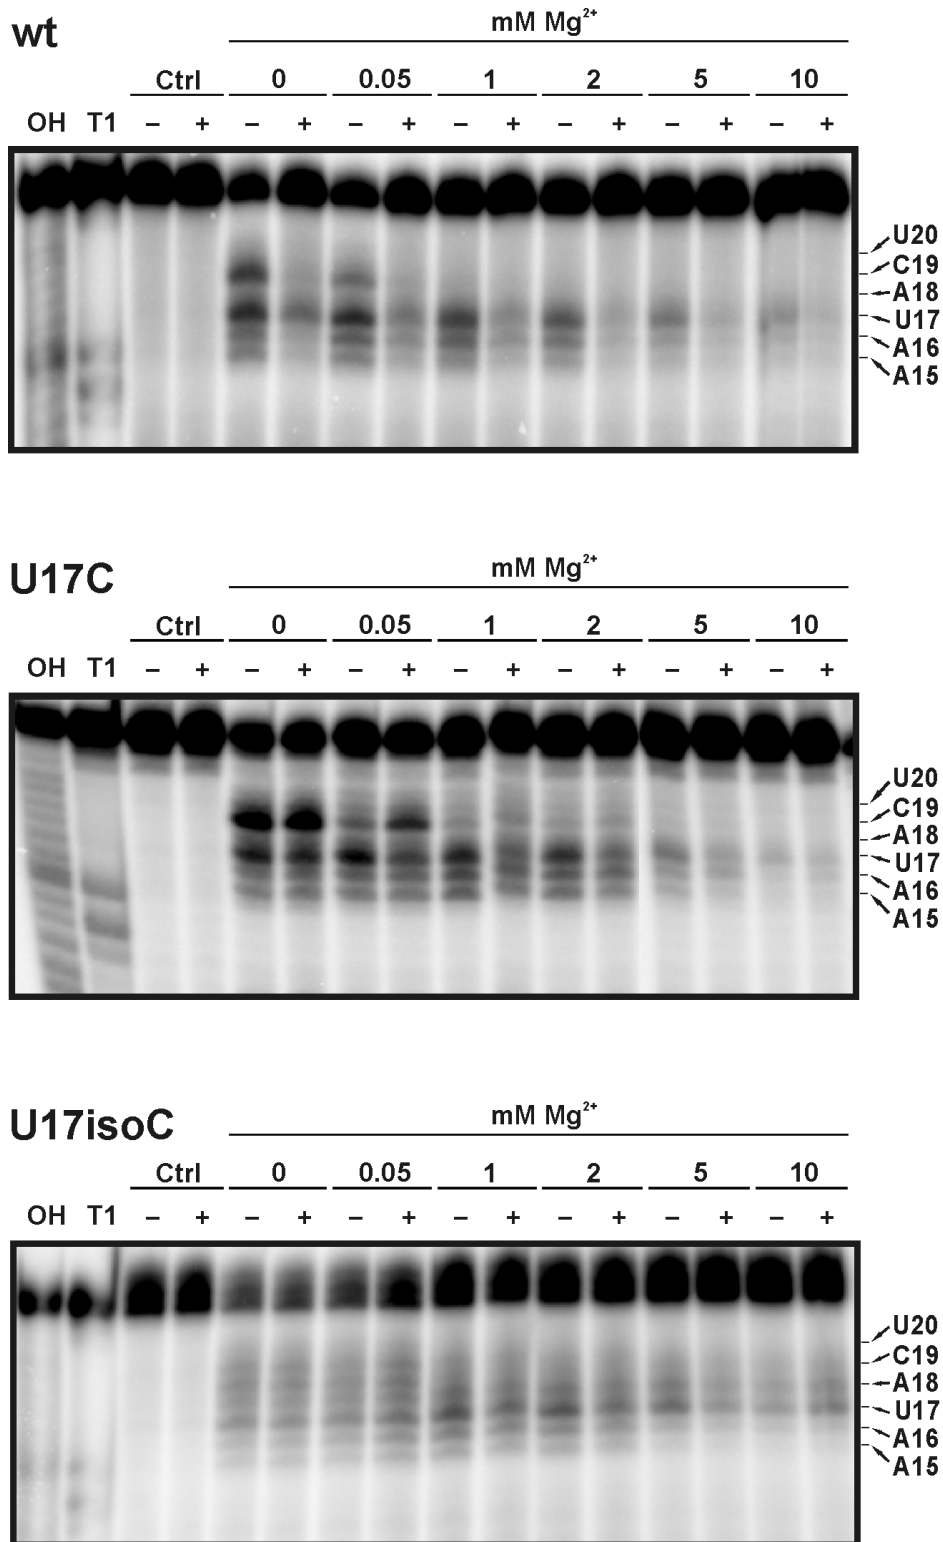

**Figure S5.** Lead probing PAGE gel showing 5'-<sup>32</sup>P-labeled wildtype, U17C and U17isoC mutant ribozyme in dependence of Mg<sup>2+</sup> (0-10 mM) and Diels-Alder product. '+' 1 mM Diels-Alder product, '-' no product. The "+" and "-" lane at one Mg<sup>2+</sup> ion concentration should be directly compared with each other for changes in the probing pattern. Lane designations as in Fig. 3c.

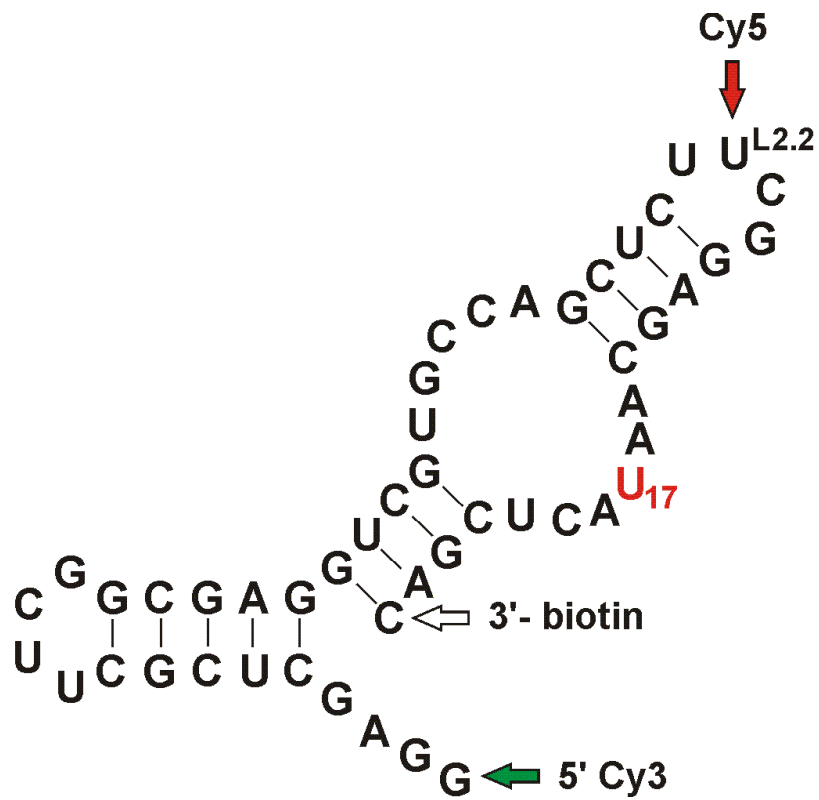

**Figure S6.** Structure of the dye-labeled ribozyme variants used in the smFRET studies. In position 17, either U or isoC are incorporated.

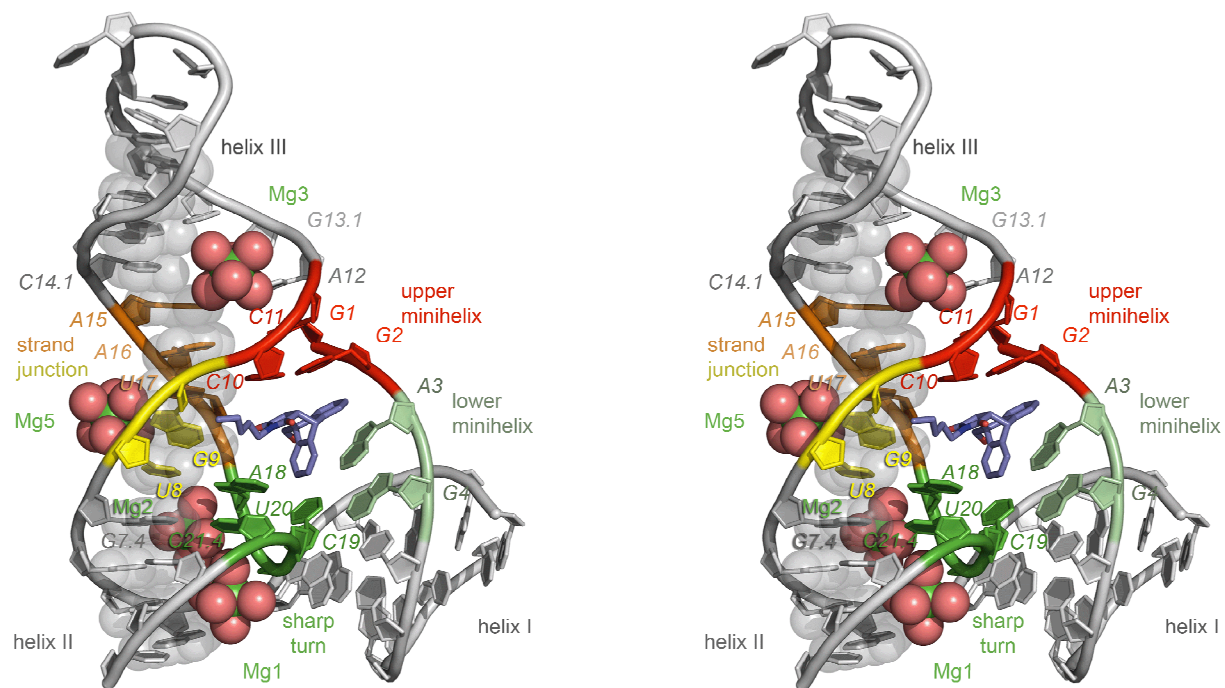

**Figure S7.** Stereo view (cross-eyed) of the Diels-Alderase ribozyme.



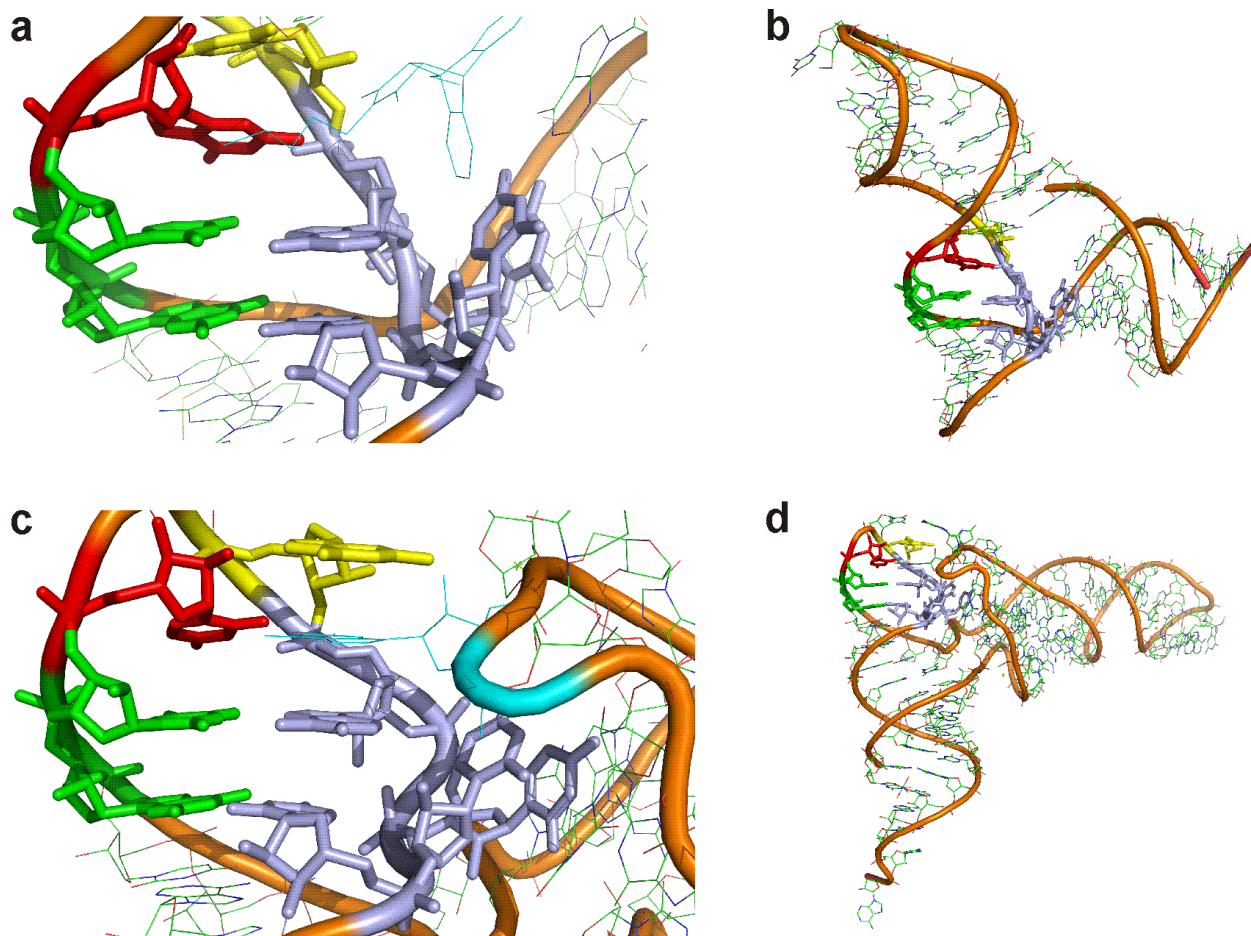

**Figure S8.** Comparison of the structures of the Diels-Alderase sharp turn (panels **a,b**) and the T-loop of tRNA<sup>Phe</sup> (**c,d**).
